# Supplementary material for: Functional scale inhibitor nanoparticle capsule delivery vehicles for oilfield mineral scale control
Source: Royal Society of Chemistry journal article supplement (doi:10.1039/c6ra05427g), 2016-01-01
Supplement: c6ra05427g1.pdf [file c6ra05427g1.pdf]

**Electronic Supporting Information for:**  
**Functional scale inhibitor nanoparticle capsule delivery vehicles for**  
**oilfield mineral scale control**

Ping Zhang <sup>a,\*</sup>, Gedeng Ruan <sup>a</sup>, Amy T. Kan <sup>a,b</sup> and Mason B. Tomson <sup>a,b,\*</sup>

<sup>a</sup>Department of Civil and Environmental Engineering,  
Rice University, Houston, Texas

<sup>b</sup>Nanosystems Engineering Research Center for Nanotechnology-Enabled Water Treatment,  
Rice University, Houston, Texas

Manuscript prepared for *RSC Advances*

\* To whom correspondence should be addressed: [ping.zhang@alumni.rice.edu](mailto:ping.zhang@alumni.rice.edu) and  
[mtomson@rice.edu](mailto:mtomson@rice.edu)

## 1. Charge ratio (C<sub>R</sub>) calculation:

Charge ratio (CR) is defined as:<sup>1-3</sup>

$$C_R = \frac{[anion] \times |z_-|}{[polymer] \times |z_+|} \quad (\text{Eq. ESI-1})$$

where  $z_-$  is the negative charge per anion and  $z_+$  is the positive charge per chain of polyamine. Since DTPMP molecule is in the form of  $H_4DTPMP^{6-}$ ,  $z_-$  is 6 for DTPMP. Each chain of PAH has one positive charge thus  $z_+$  is 1. Considering a PAH solution concentration of  $1 \text{ mg mL}^{-1}$  and the molecular weight of each chain is  $93.5 \text{ g mole}^{-1}$ , PAH concentration is calculated to be  $0.0107 \text{ M}$ . DTPMP concentration is  $0.1 \text{ M}$ . Recognizing the volume of PAH solution is  $15 \text{ mL}$  and the volume of DTPMP is  $1 \text{ mL}$ ,  $C_R$  can be easily calculated as 3.7.

## 2. Understanding the SINC particle transport via advection and diffusion mechanism

### 2.1 Theory

From the standpoint of advection and diffusion, the transport of inhibitor nanofluid can be mathematically described by a one-dimensional advection dispersive equation:<sup>4-6</sup>

$$R \frac{\partial C}{\partial t} - D \frac{\partial^2 C}{\partial x^2} + v \frac{\partial C}{\partial x} + J_d C = 0 \quad (\text{Eq. ESI-2})$$

$C \text{ (mg L}^{-1}\text{)}$  is the effluent SINC concentration at a given time;  $t \text{ (min)}$  is the time;  $D \text{ (cm}^2 \text{ min}^{-1}\text{)}$  is the hydrodynamic dispersion coefficient;  $x \text{ (cm)}$  accounts for the distance of SINC transport inside the column; and  $v \text{ (cm min}^{-1}\text{)}$  is the linear pore velocity calculated as  $v=Q/\pi r^2 \varepsilon$ , where  $Q$  is the flow rate ( $\text{ml min}^{-1}$ );  $\varepsilon$  is the sandstone medium porosity, and  $r \text{ (cm)}$  is the cross sectional radius of the column bed. Linear pore velocity is the average travel velocity for SINC particles. The first term of Eq. ESI-2 is the SINC concentration change at a given time; the second term is the change in concentration due to diffusion/dispersion; the third term represents SINC concentration change associated with advection and the last term is the SINC particle mass removal modeled as a first order deposition process.<sup>4</sup> The values of  $R$  and  $J_d$  in each transport study were acquired by minimizing the differences between the calculated

effluent concentrations based on Eq. ESI -2 and the experimentally observed effluent concentrations via the least square method. Excel Solver function was used to find the R and  $J_d$  values.

## 2.2 Characterization of sandstone medium via tracer breakthrough test

A tracer (tritiated water) test was carried out to measure the pore volume and the hydrodynamic dispersion coefficient (D) ( $\text{cm}^2 \text{min}^{-1}$ ) of the packed column. According to the breakthrough curves of the tracer in sandstone medium, the D values can be obtained by fitting the one-dimensional advection-dispersion equation (Eq. ESI-2) (without the last term) to the acquired data using CXTFIT code<sup>7</sup>, by setting the retardation factor (R) to one:

$$\frac{\partial C}{\partial t} = D \frac{\partial^2 C}{\partial x^2} - v \frac{\partial C}{\partial x} \quad (\text{Eq. ESI-3})$$

where C ( $\text{mg L}^{-1}$ ) is the effluent nanomaterials concentration at a certain time; t (min) denotes the time. The obtained D value is  $0.07 \text{ cm}^2 \text{min}^{-1}$  at a pore velocity of  $4.5 \text{ cm min}^{-1}$ . Dispersion coefficient ( $\text{cm}^2 \text{min}^{-1}$ ) is the product of dispersivity (cm) with pore velocity ( $\text{cm min}^{-1}$ ).

$$D = \alpha_d \times v \quad (\text{Eq. ESI-4})$$

where  $\alpha_d$  (cm) is the dispersivity.  $\alpha_d$  for sandstone medium at  $4.5 \text{ cm min}^{-1}$  pore velocity is calculated to be  $0.0156 \text{ cm}$  ( $156 \mu\text{m}$ ). Dispersivity is a characteristic property of a media<sup>4</sup>. Thus, the dispersivity of Louise sandstone should be maintained the same at different pore velocities. By assuming the same dispersivity of  $0.0156 \text{ cm}$ , the D value for TE #7 (pore velocity of  $2.4 \text{ cm min}^{-1}$ ) is calculated to be  $2.4 * 0.0156 = 0.037 \text{ cm}^2 \text{min}^{-1}$ .

### 3. Understanding the SINC transport via filtration and attachment mechanism:

The transport of SINC particles is a course of the particles being continuously removed by sandstone medium via collection and attachment of SINC particles to sandstone surfaces. The deposition of SINC particles to sandstone medium surface includes two consecutive steps: collection of SINC particles by medium surfaces (particle collection) and subsequent attachment of the SINC particles to medium surface (particle attachment).<sup>5</sup> Therefore, a collection efficiency ( $\eta_0$ ) and an attachment efficiency ( $\alpha$ ) were introduced to describe the particle collection and attachment processes, respectively. The collection efficiency ( $\eta_0$ ) considers the particle collection due to Brownian diffusion, interception and sedimentation. Thus, the  $\eta_0$  term can be expressed as the sum of these three mechanisms:<sup>4-6</sup>

$$\eta_0 = \eta_D + \eta_I + \eta_G \quad (\text{Eq. ESI-5})$$

where  $\eta_D$ ,  $\eta_I$  and  $\eta_G$  are the single collector efficiency components due to Brownian diffusion, interception and sedimentation, respectively. Typically, the Brownian diffusion will be dictating the collection of submicron sized particles to the medium surface within the particle size range of 1  $\mu\text{m}$ .<sup>5,6</sup>

These three components can be calculated as a function of several dimensionless groups as follows<sup>8</sup>:

$$\eta_D = 2.4A_s^{1/3}N_R^{-0.081}N_{pe}^{-0.715}N_{vdW}^{-0.052} \quad (\text{Eq. ESI-6})$$

where  $A_s$  is the porosity-dependent parameter of Happel's model,  $N_R$  is the aspect ratio,  $N_{pe}$  is the Peclet number, and  $N_{vdW}$  is the van der Waals number.  $A_s$  is the porosity-dependent parameter of Happel's model and is defined as:

$$A_s = \frac{2(1-\gamma^5)}{2-\gamma+3\gamma^5-2\gamma^6} \quad (\text{Eq. ESI-7})$$

where  $\gamma = (1-\epsilon)^{1/3}$ ,  $\epsilon$  is the porosity of the porous medium.  $N_R$  is the ratio of particle diameter ( $d_p$ ) to spherical collector diameter ( $d_c$ ) (i.e.  $N_R = \frac{d_p}{d_c}$ ).

$$N_{pe} = \frac{vd_c}{D_\infty} \quad (\text{Eq. ESI-8})$$

where  $v$  ( $\text{m s}^{-1}$ ) is the pore velocity,  $D_\infty$  ( $\text{m}^2 \text{s}^{-1}$ ) is the diffusion coefficient in an infinite medium, which, according to Stocks-Einstein relation, is defined as:

$$D_\infty = \frac{kT}{3\pi\mu d_p} \quad (\text{Eq. ESI-9})$$

where  $k$  is the Boltzmann constant ( $1.38 \times 10^{-23} \text{ J K}^{-1}$ );  $T$  (K) is the absolute temperature;  $\mu$  ( $\text{kg m}^{-1} \text{ s}^{-1}$ ) is the absolute viscosity of the fluid (water). The van der Waals number  $N_{vdW}$  is defined as:

$$N_{vdW} = \frac{A}{kT} \quad (\text{Eq. ESI-10})$$

where  $A$  is the Hamaker constant (assumed to be  $10^{-20} \text{ J}$ ). Moreover,

$$\eta_I = 0.55A_s N_R^{1.55} N_{pe}^{-0.125} N_{vdW}^{0.125} \quad (\text{Eq. ESI-11})$$

$$\eta_G = 0.475N_R^{-1.35} N_{pe}^{-1.11} N_{vdW}^{0.053} N_{gr}^{1.11} \quad (\text{Eq. ESI-12})$$

where  $N_{gr}$  is the gravitational force number, defined as:

$$N_{gr} = \frac{d_p^4(\rho_p - \rho_f)g}{3kT} \quad (\text{Eq. ESI-13})$$

where  $\rho_p$  is the density of the nanoparticles;  $\rho_f$  is the density of fluid and  $g$  is the gravitational acceleration,  $9.81 \text{ m s}^{-2}$ .

#### 4. Consolidated core transport breakthrough curve:

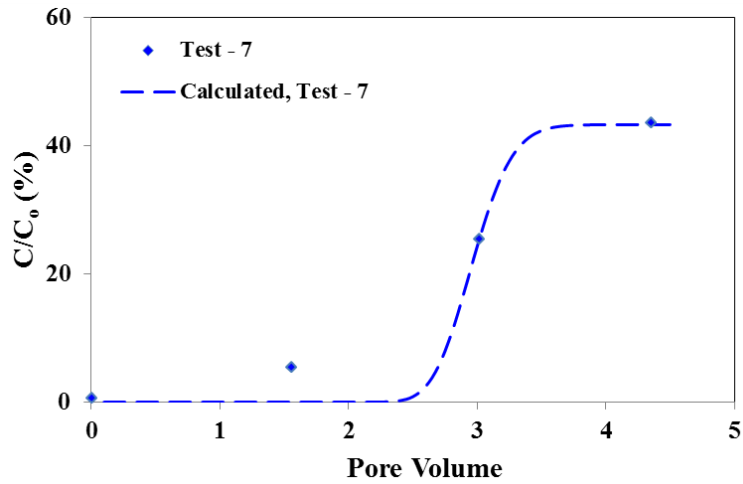

Figure ESI-1 Breakthrough curve of SINC particles in consolidated sandstone core (TE #7). Diamond dots were experimentally obtained and the dashed line was obtained from advection dispersive equation calculation.

## References:

1. R.K. Rana, V.S. Murthy, J. Yu and M.S. Wong, Nanoparticle Self-Assembly of Hierarchically Ordered Microcapsule Structures, *Adv. Mater.*, 2005, 17, 1145-1150.
2. J. Yu, V.S. Murthy, R.K. Rana and M.S. Wong, Synthesis of nanoparticle-assembled tin oxide/polymer microcapsules, *Chem. Commun.*, 2006, 1097–1099.
3. J. Yu, M.A. Yaseen, B. Anvari and M.S. Wong, Synthesis of Near-Infrared-Absorbing Nanoparticle-Assembled Capsules, *Chem. Mater.* 2007, 19, 1277-1284.
4. R. J. Charbeneau, *Groundwater Hydraulics And Pollutant Transport*, 1st edn, Waveland Press, Long Grove, IL, 2006.
5. M.M. Clark, *Transport Modeling for Environmental Engineers and Scientists*, 2nd edn., John Wiley & Sons, Hoboken, NJ, 2009.
6. J.N. Ryan and M. Elimelech, Colloid mobilization and transport in groundwater. *Colloids Surf., A*, 1996, 107, 1-56.
7. Parker, J. C. and van Genuchten, M. T., *Determining Transport Parameters from Laboratory and Field Tracer Experiments*. Blacksburg, VA, 1984; Vol. Bulletin 84-3.
8. N. Tufenkji and M. Elimelech, Correlation Equation for Predicting Single-Collector Efficiency in Physicochemical Filtration in Saturated Porous Media. *Environ. Sci. Technol.* 2004, 38, 529-536.
